# Supplementary material for: Digital Teaching Competence in Higher Education: A Systematic Review
Source: MDPI journal article supplement (doi:10.3390/educsci11110689), 2021-10-29
Supplement: s1 [file s1]

Archive with 1 entries (1 files):
- education-1390560-supplementary.pdf
